# Supplementary material for: Differential Use of Human Neutrophil FcγReceptors for Inducing Neutrophil Extracellular Trap Formation
Source: Hindawi journal article supplement (doi:10.1155/2016/2908034), 2016-01-01
Supplement: f1 [file 2908034.f1.pdf]

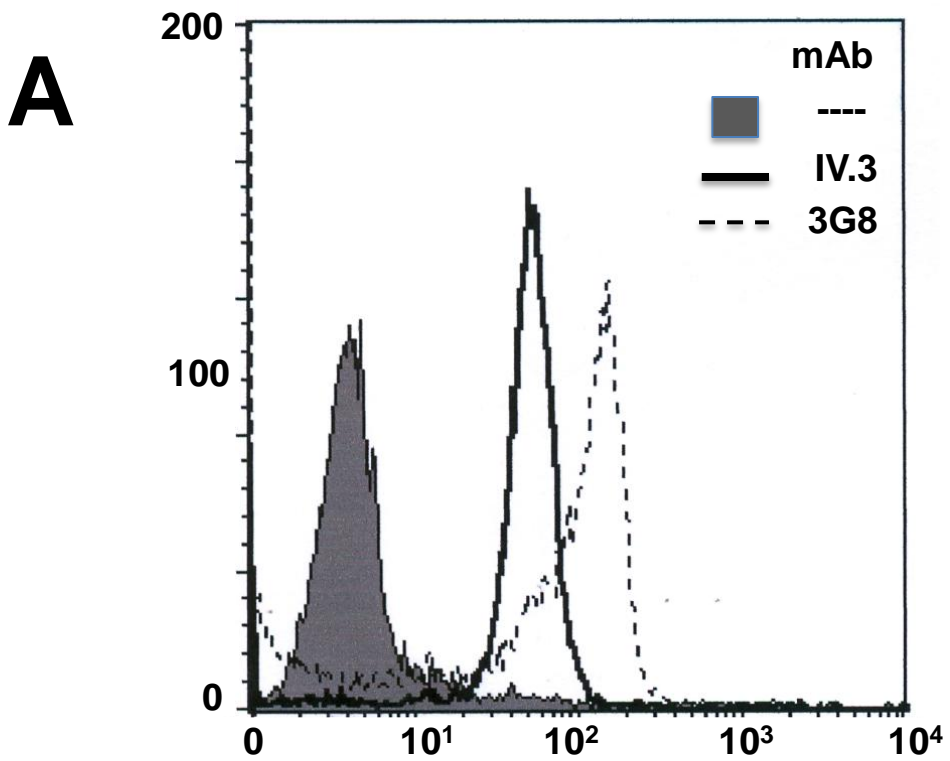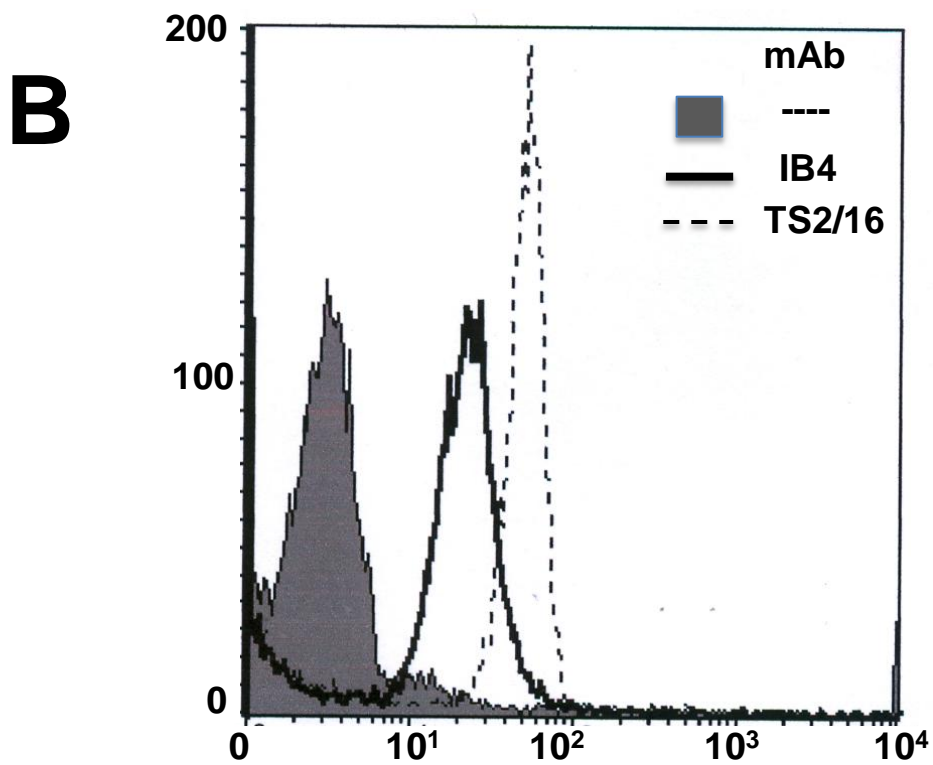

Figure 1S

**Bright field**

**DNA**

---

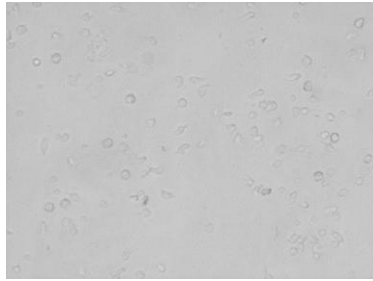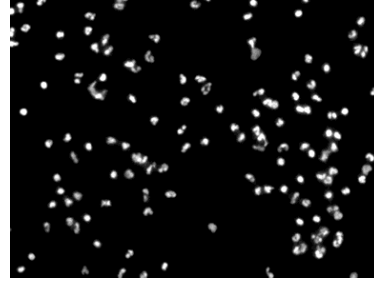

**PMA**

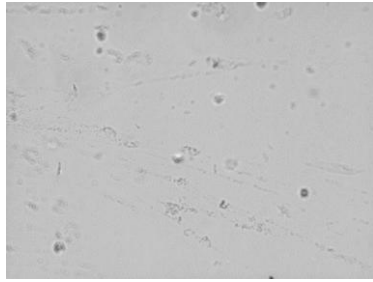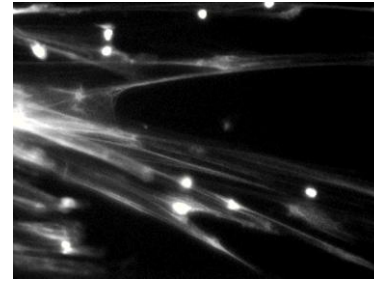

**FcγRIIa**

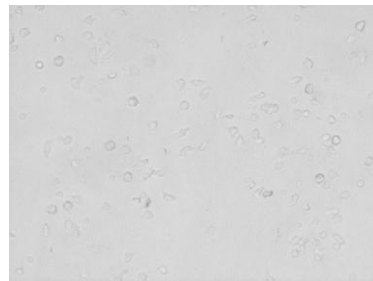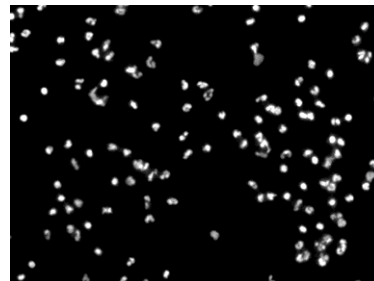

**FcγRIIIb**

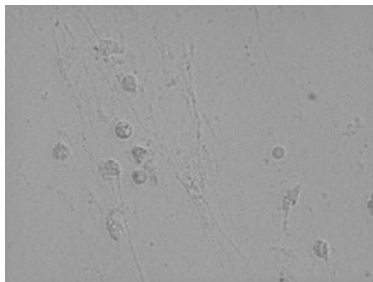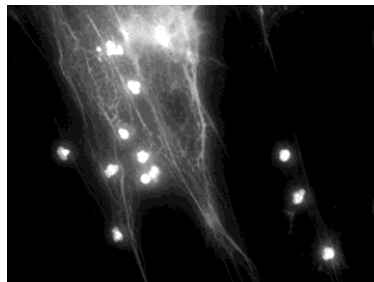

**β1  
Integrin**

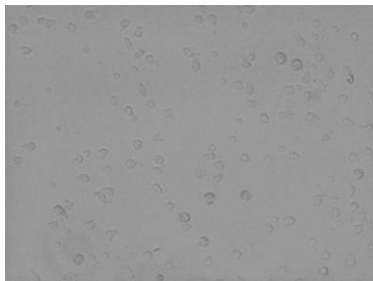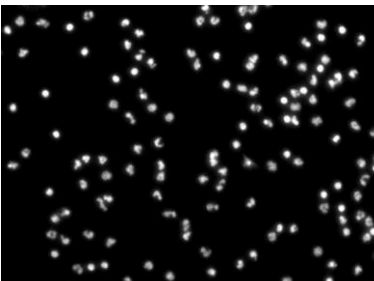

**β2  
Integrin**

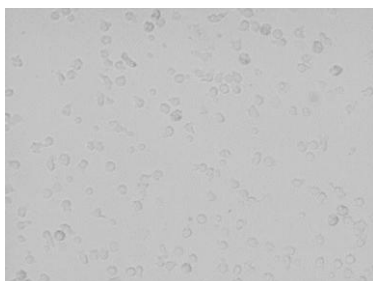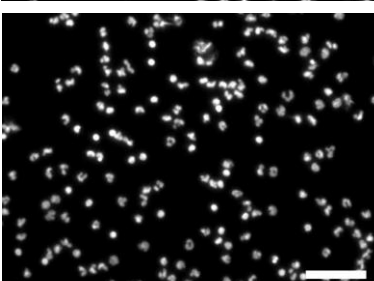

**Figure 2S**

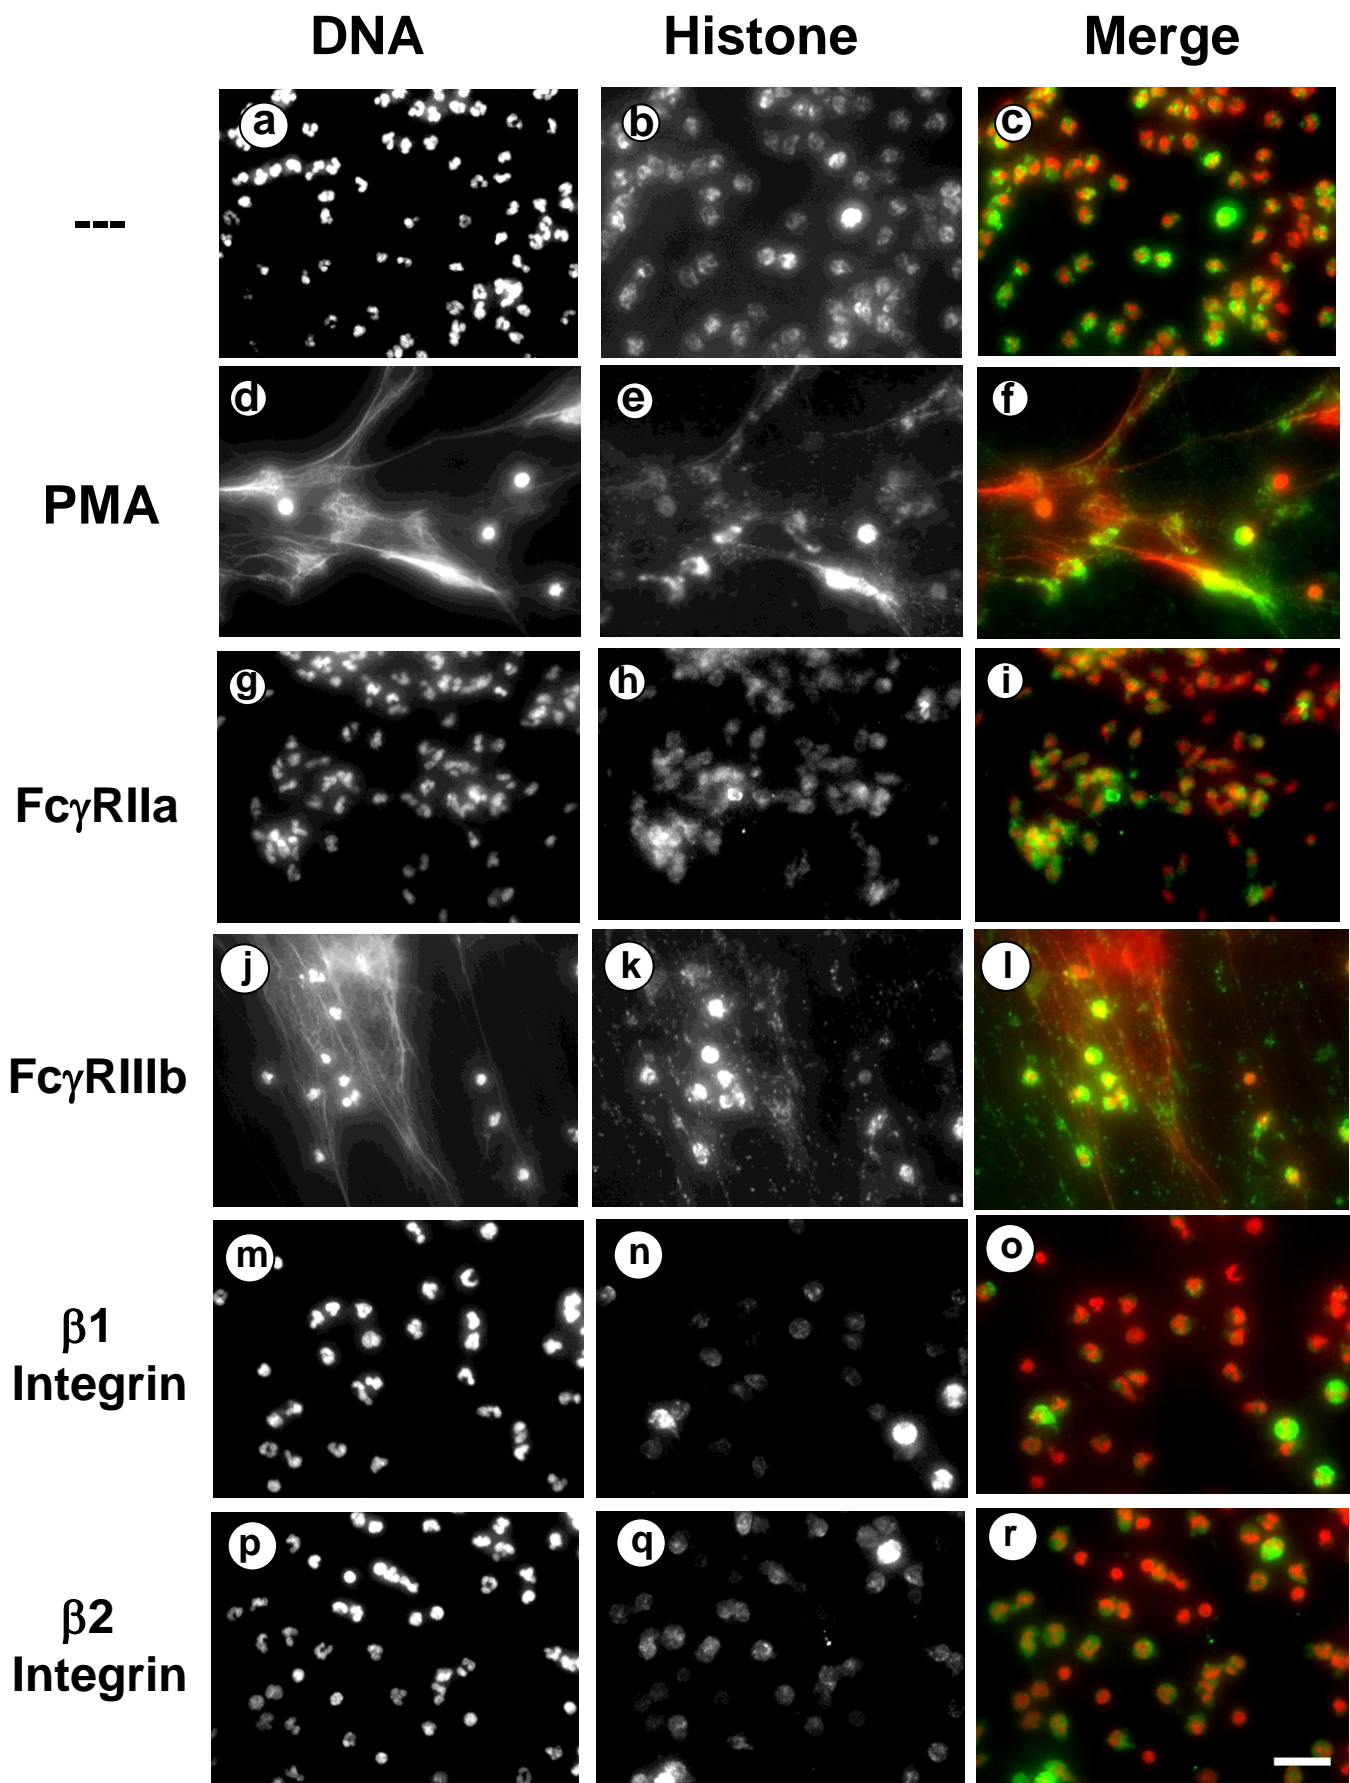

Figure 3S

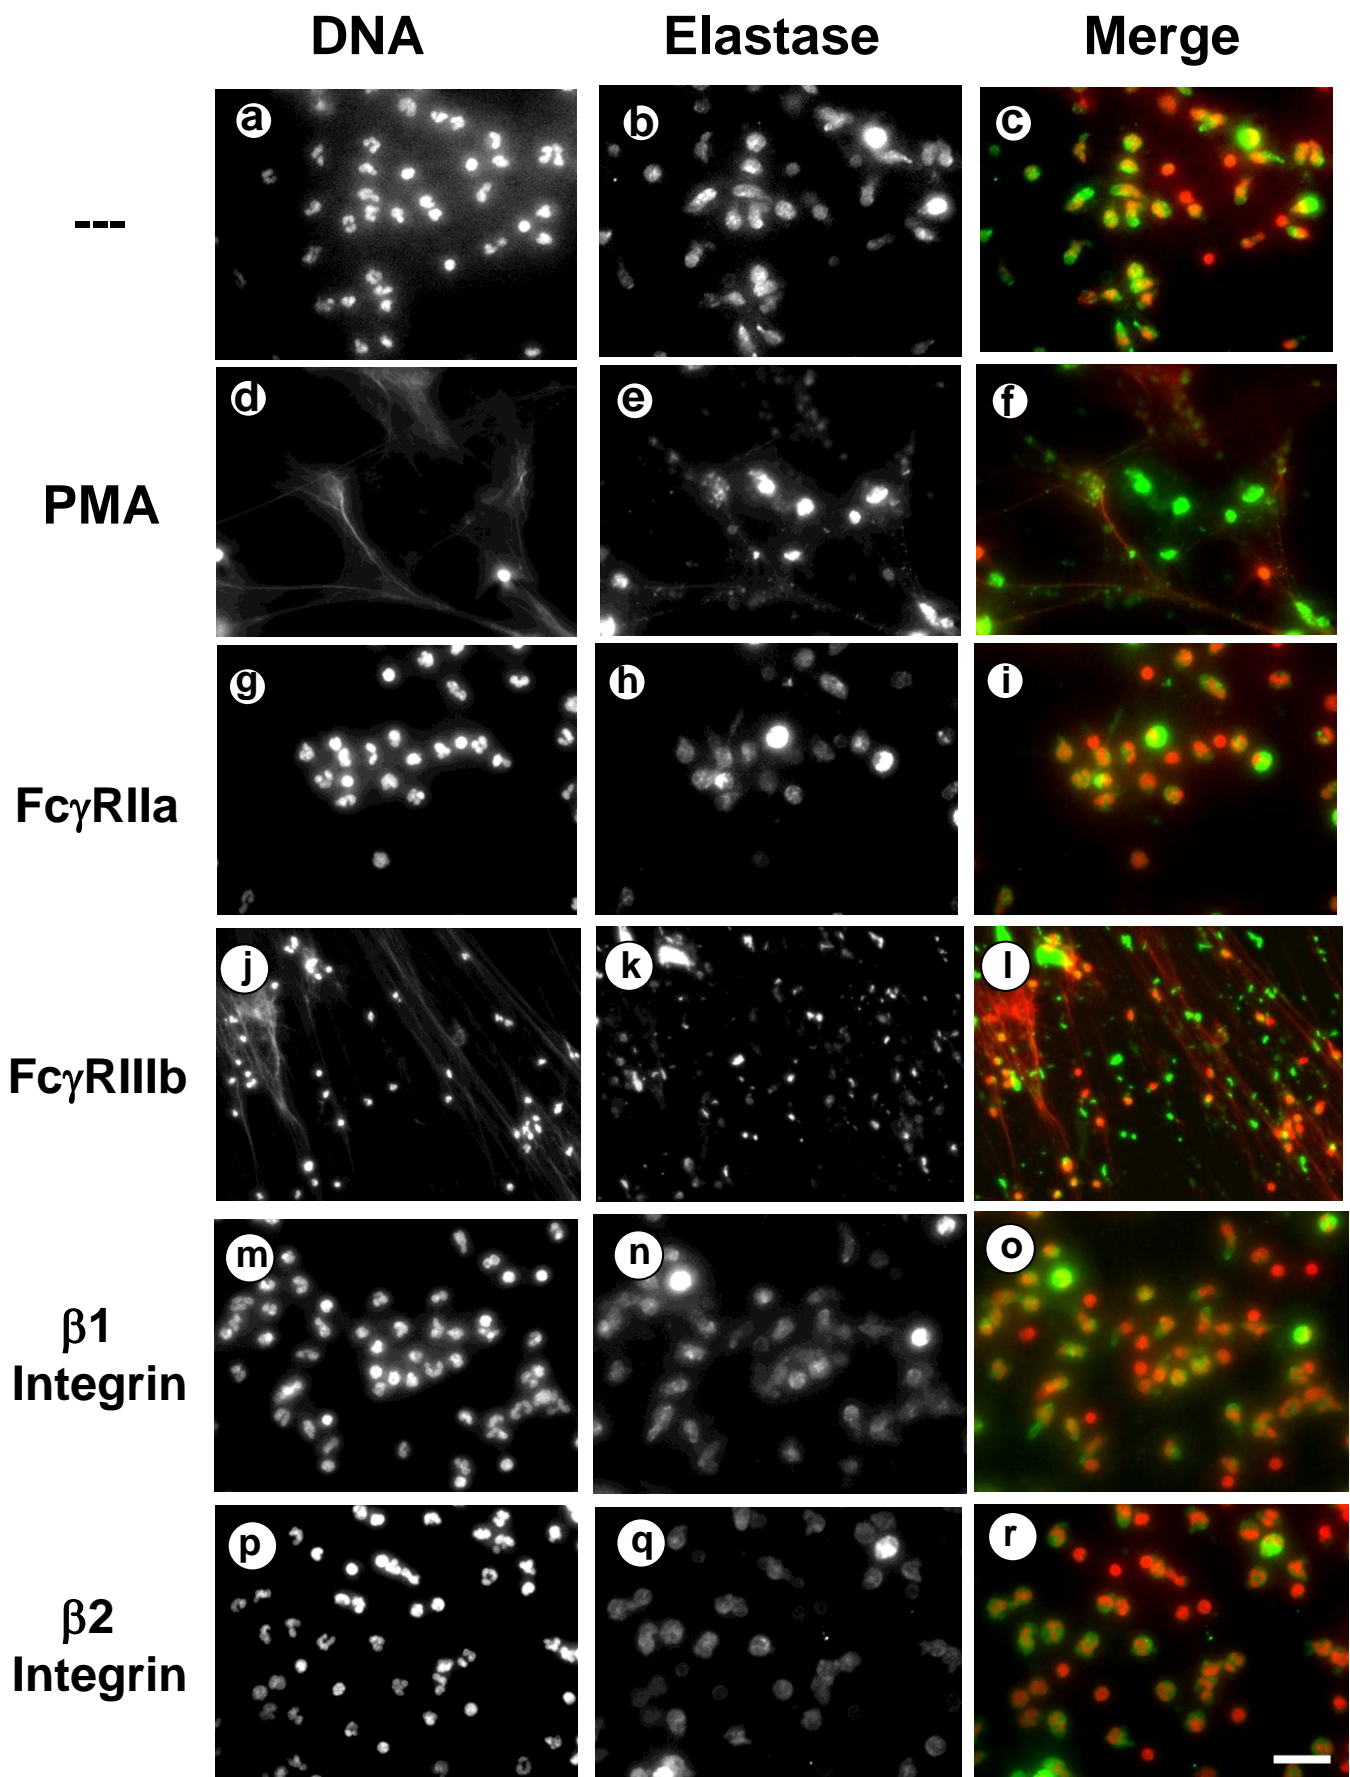

Figure 4S



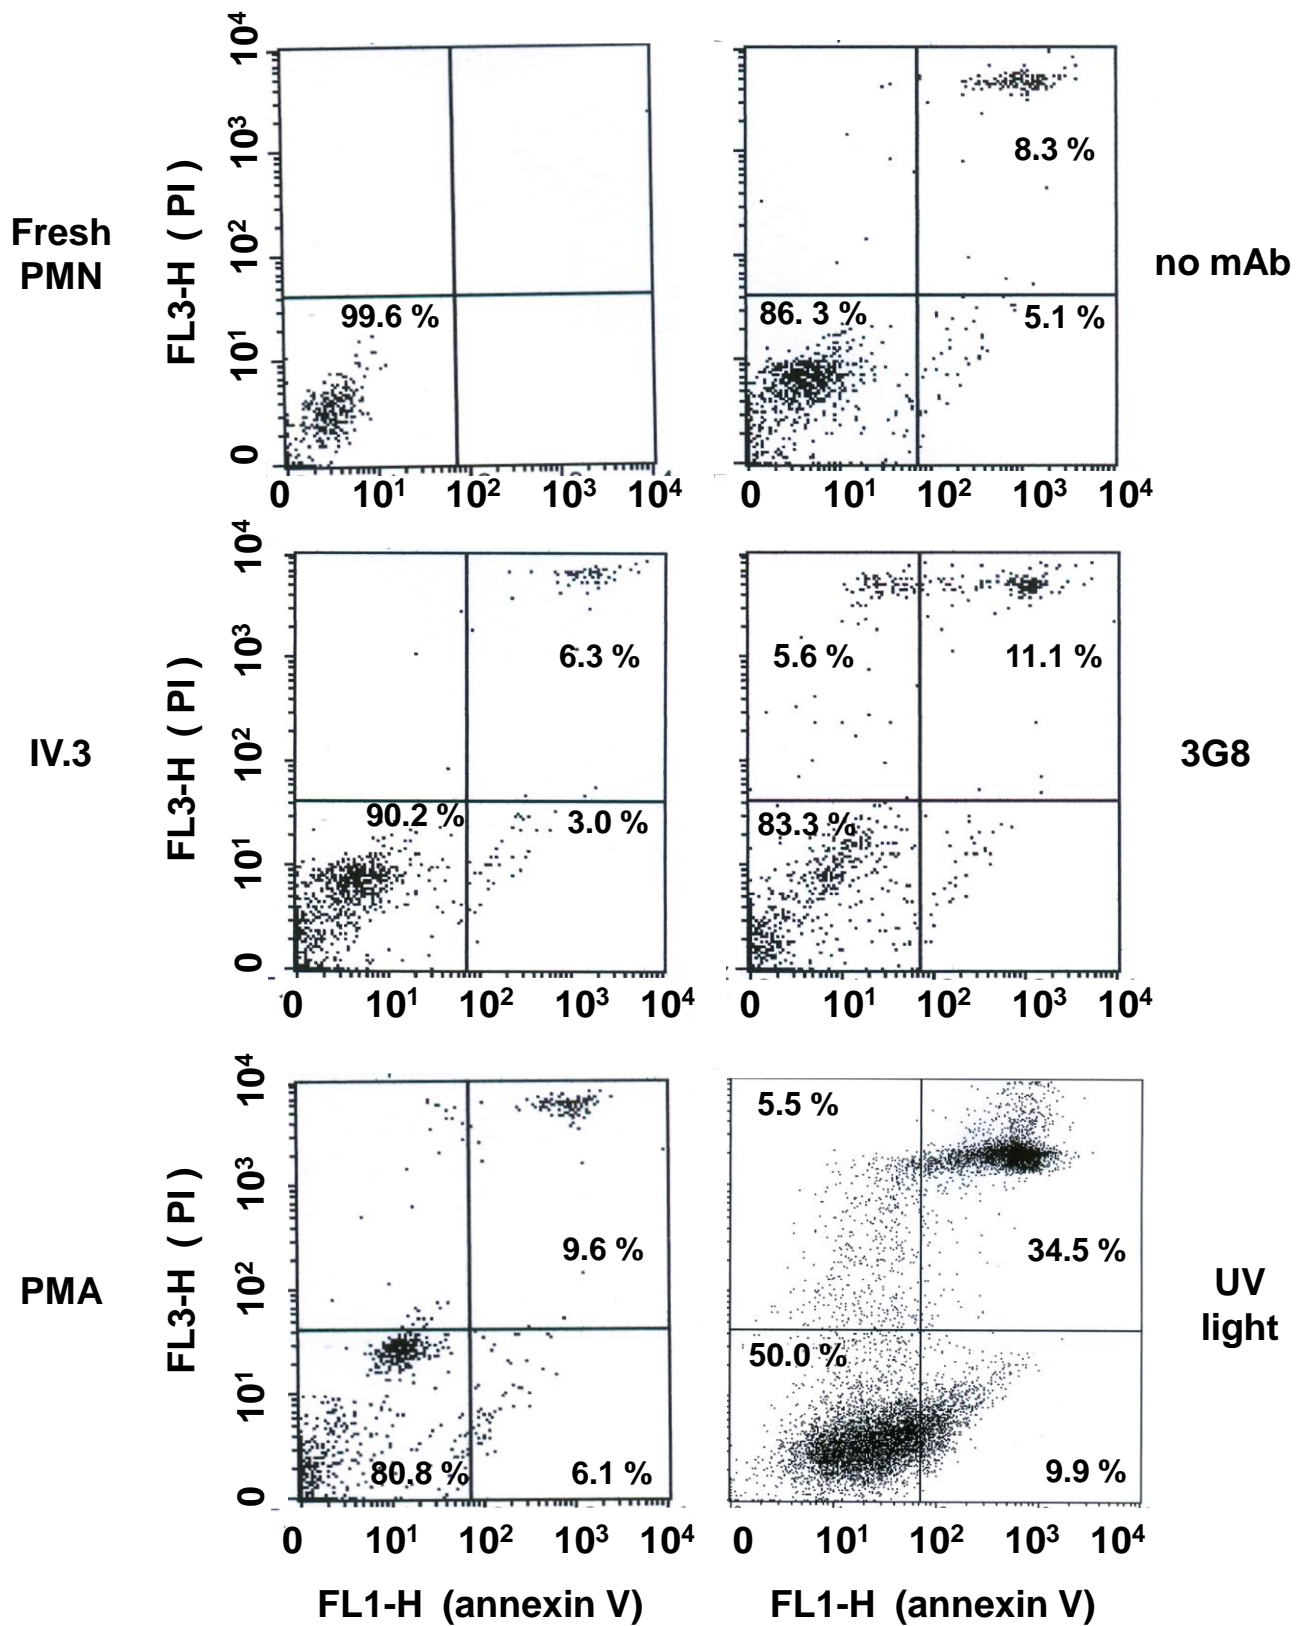

Figure 5S

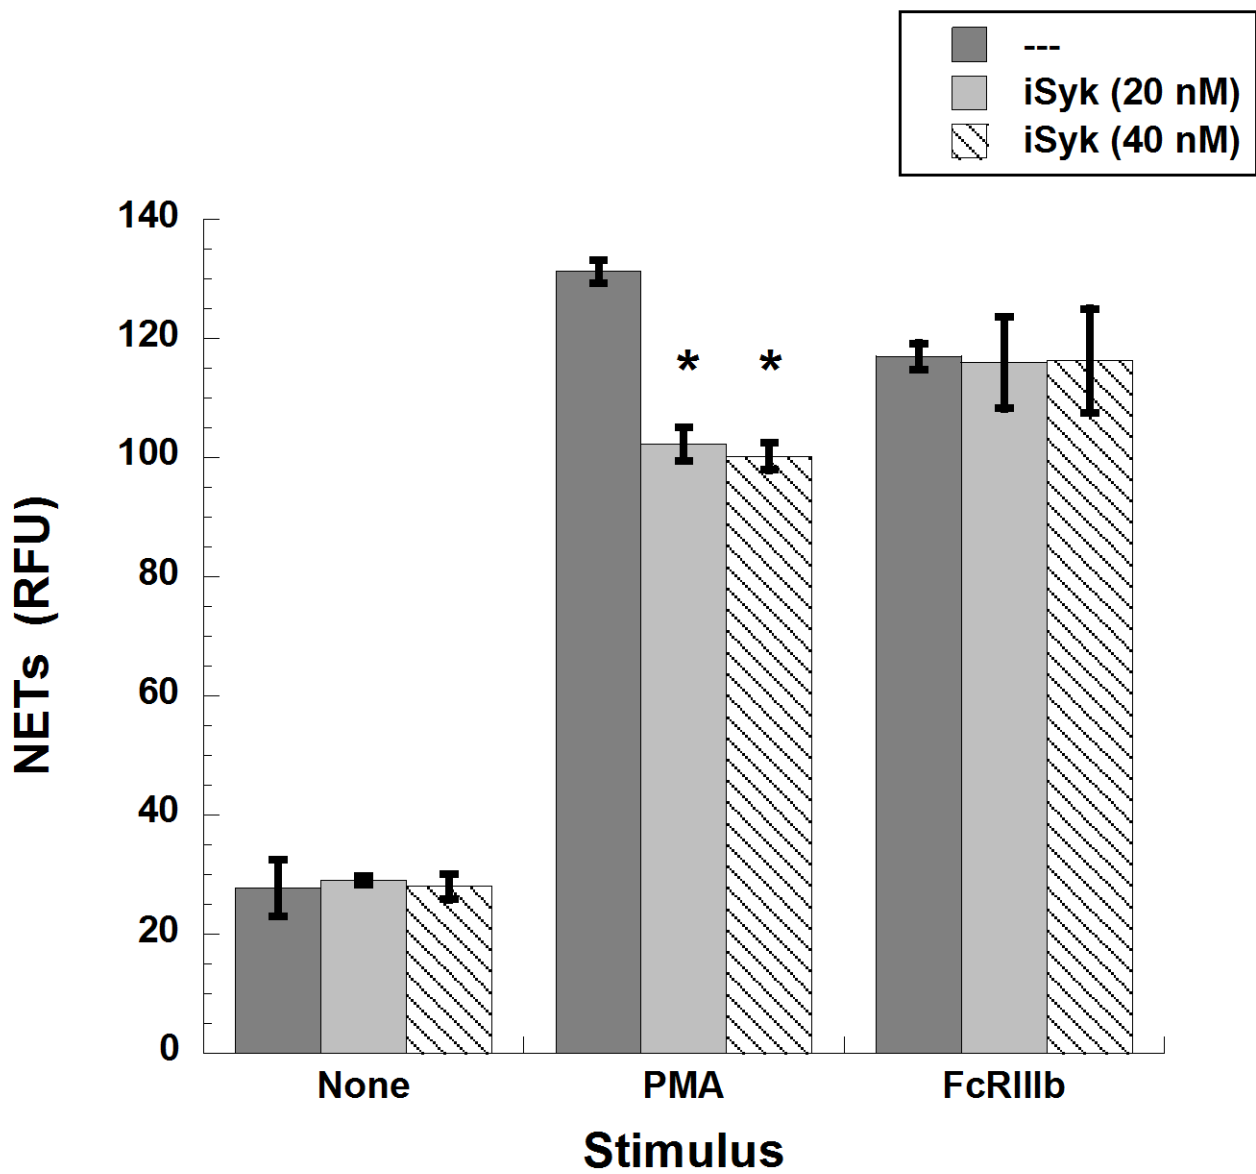

Figure 6S

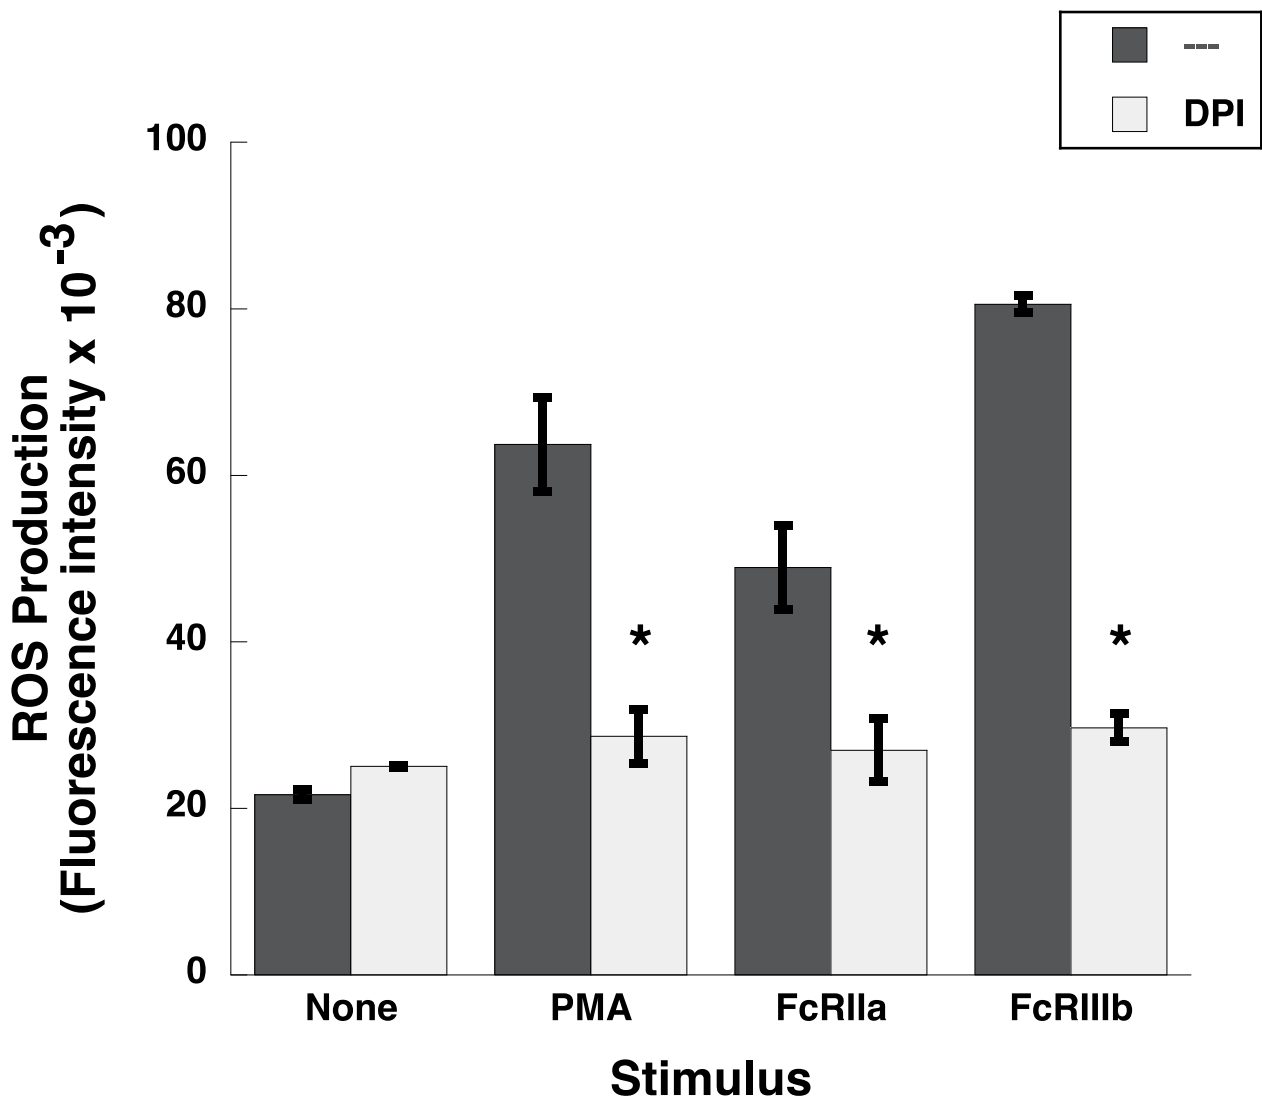

Figure 7S

**A**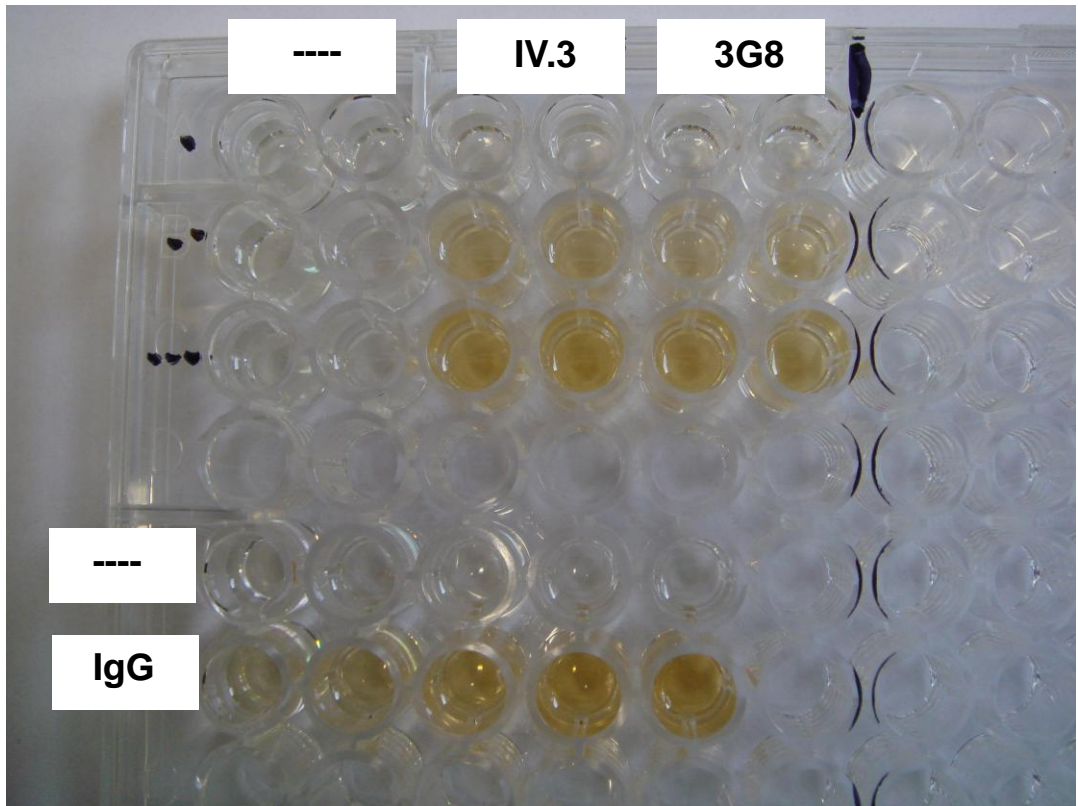**B**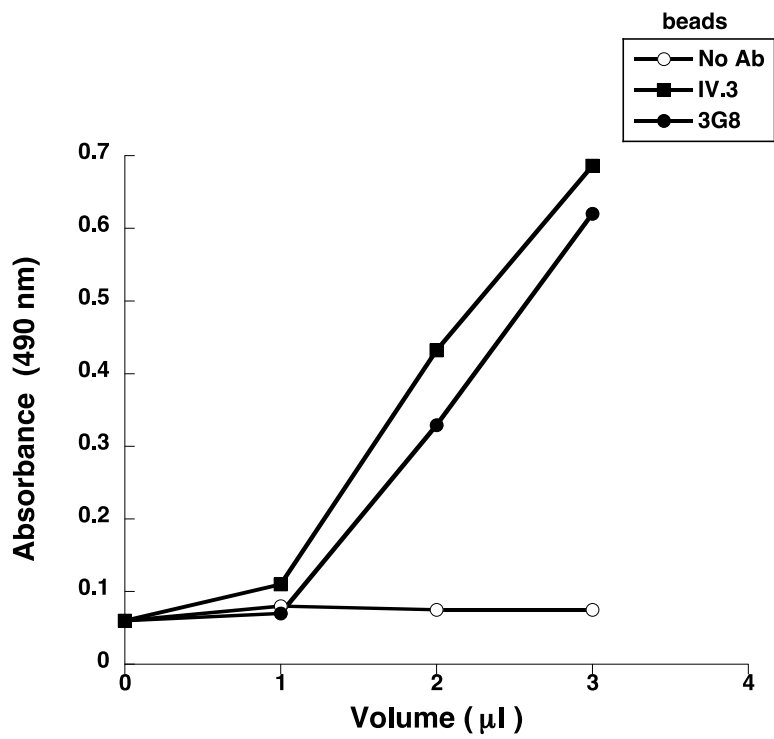**Figure 8S**



**A**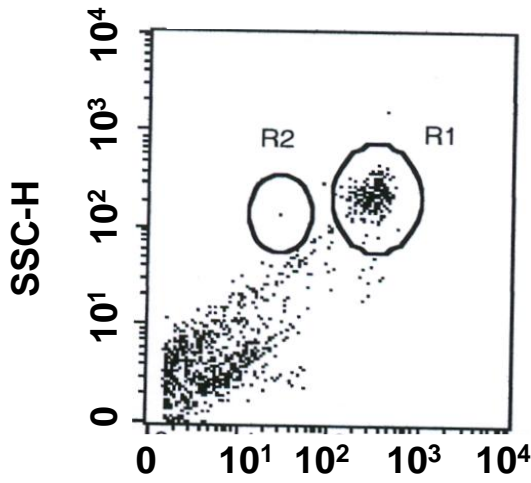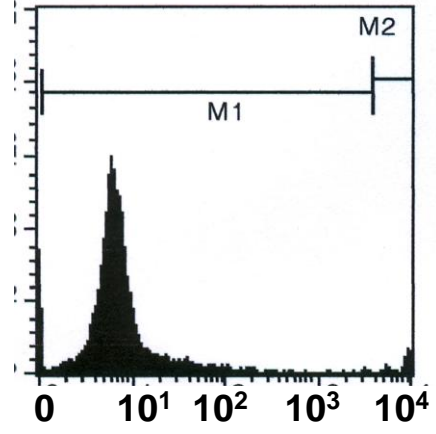**R1****B**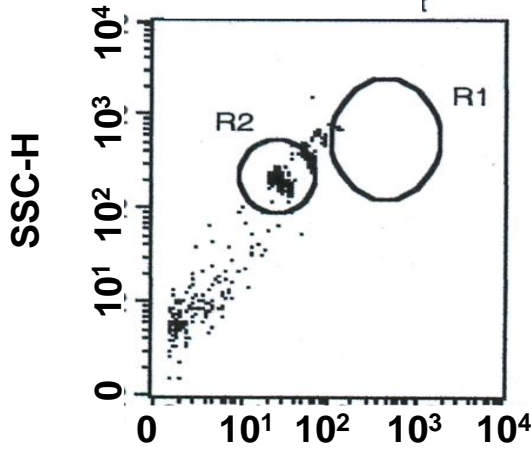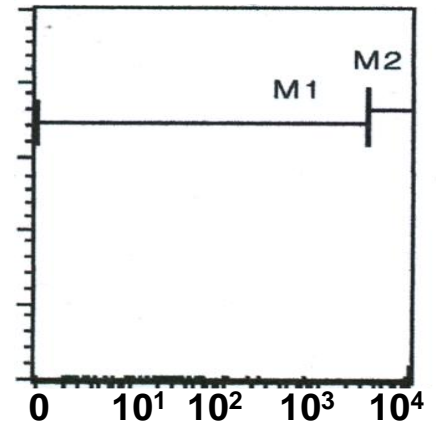**R1****C**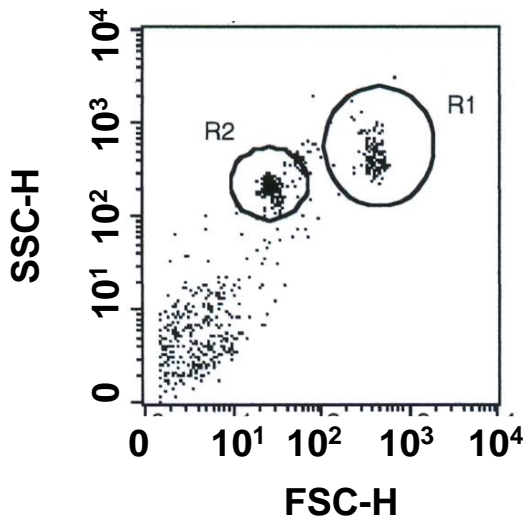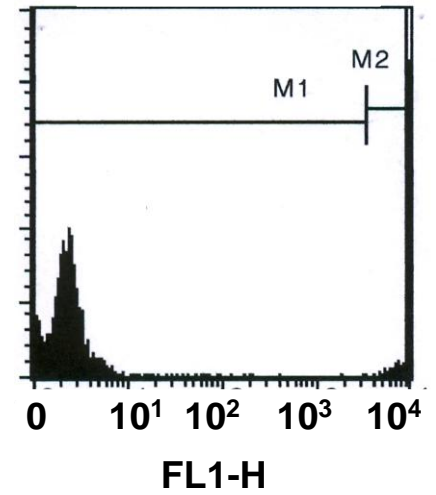**R1**

**A**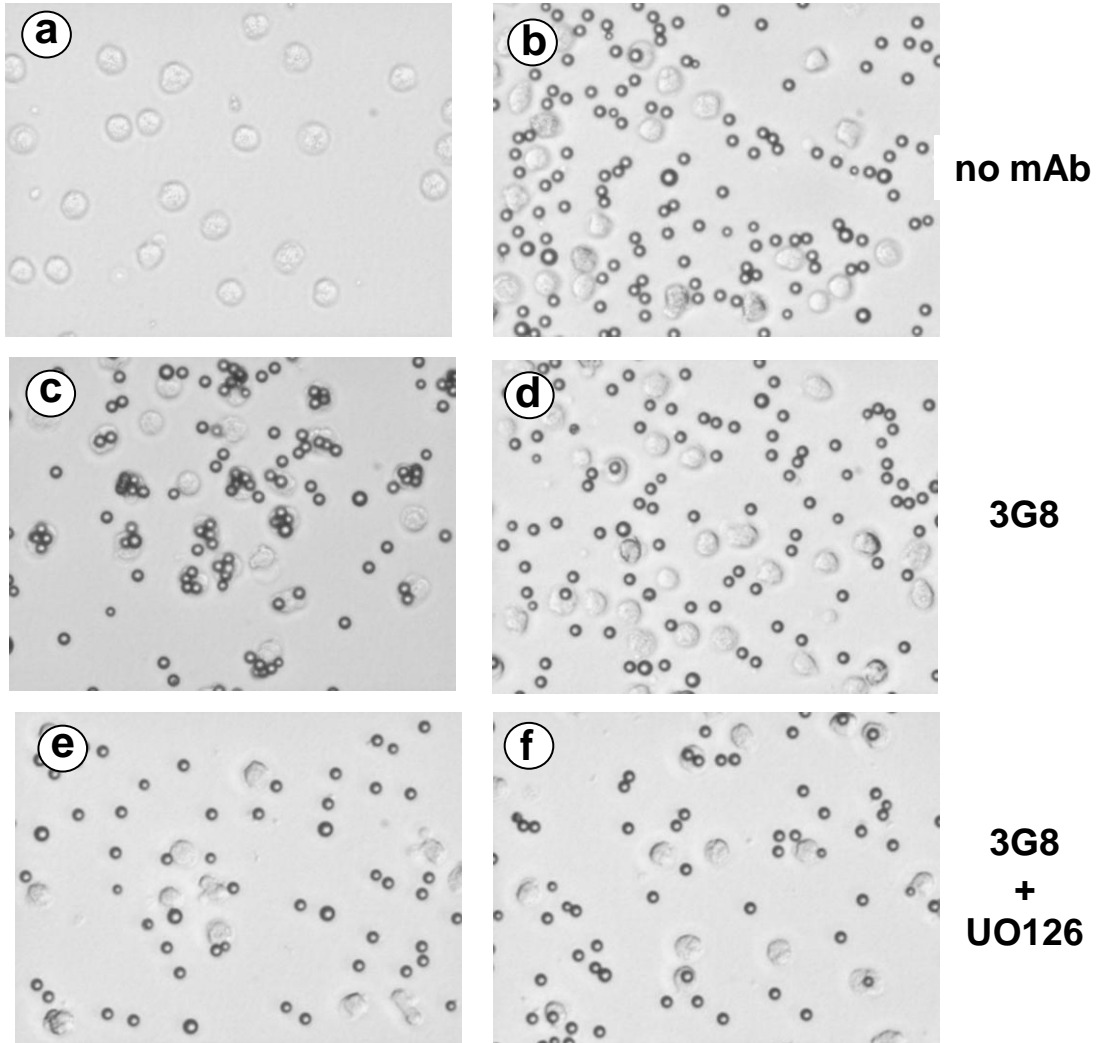**B**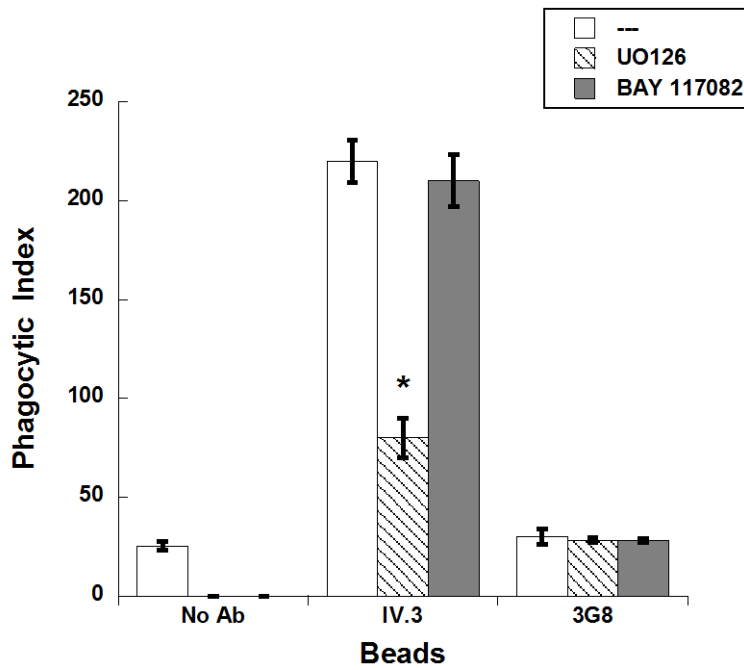**Figure 10S**
